# Supplementary material
Source: PubMed Central journal article supplement (PMC6543695)
Supplement: plantbiotechnology-34-4-17.1107-s001.pdf [file plantbiotechnology-34-4-17.1107-s001.pdf]

Table S1. Identification of genes that increase enzymatic saccharification efficiency

| Gene ID   | Overexpressed sequence <sup>a</sup> | Gene symbol                                                                           | Function category <sup>b</sup> | Change in glucose yield <sup>c</sup> (seedlings) | Change in glucose yield <sup>c</sup> (stems) | Change in xylose yield <sup>c</sup> (stems) |
|-----------|-------------------------------------|---------------------------------------------------------------------------------------|--------------------------------|--------------------------------------------------|----------------------------------------------|---------------------------------------------|
| AT1G64620 | pda12524                            | DOF18                                                                                 | TF (Dof type)                  | 160.47                                           | 106.23                                       | 113.37                                      |
| AT5G15830 | pda10857                            | BASIC LEUCINE-ZIPPER 3 (BZIP3)                                                        | TF (bZIP type)                 | 128.41                                           | 92.29                                        | 92.39                                       |
| AT5G20710 | pda00366                            | BETA-GALACTOSIDASE 7 (BGAL7)                                                          | CAZyme (GH35)                  | 125.00                                           | 103.70                                       | 98.38                                       |
| AT1G22640 | pda03176                            | MYB3                                                                                  | TF (MYB type)                  | 123.66                                           | 92.32                                        | 106.57                                      |
| AT1G02640 | pda01641                            | BETA-XYLOSIDASE 2 (BXL2)                                                              | CAZyme (GH3)                   | 123.52                                           | 131.78                                       | 117.09                                      |
| AT2G26730 | pda04099                            |                                                                                       | LRR kinase                     | 119.30                                           | 119.77                                       | 97.97                                       |
| AT3G42950 | pda04403                            |                                                                                       | CAZyme (GH28)                  | 117.80                                           | 105.98                                       | 102.51                                      |
| AT5G44030 | pda13285                            | CELLULOSE SYNTHASE 4 (CESA4)/IRREGULAR XYLEM 5 (IRX5)/NWS2                            | CAZyme (GT2)                   | 113.87                                           | 85.43                                        | 106.24                                      |
| AT3G16520 | pda00717                            | UDP-GLUCOSYL TRANSFERASE 88A1                                                         | CAZyme (GT1)                   | 113.73                                           | 110.31                                       | 104.94                                      |
| AT3G18080 | pda02043                            | B-S GLUCOSIDASE 44                                                                    | CAZyme (GH1)                   | 113.37                                           | 107.77                                       |                                             |
| AT3G62720 | pda05997                            | XYLOSYLTRANSFERASE 1                                                                  | CAZyme (GT34)                  | 112.53                                           | 119.09                                       | 101.23                                      |
| AT2G28110 | pda08587                            | FRAGILE FIBER 8 (FRAS)/IRREGULAR XYLEM 7 (IRX7)                                       | CAZyme (GT47)                  | 111.84                                           | 106.74                                       | 95.99                                       |
| AT5G20240 | pda11065                            | PISTILLATA (PI)                                                                       | TF (MADS-box type)             | 111.80                                           | 88.23                                        | 89.87                                       |
| AT3G15350 | pda03008                            |                                                                                       | CAZyme (GT14)                  | 110.49                                           | 115.65                                       | 114.03                                      |
| AT3G18660 | pda04027                            | GLUCURONIC ACID SUBSTITUTION OF XYLAN 1 (GXU1)                                        | CAZyme (GT8)                   | 109.51                                           | 95.80                                        | 104.55                                      |
| AT5G13180 | pda00727                            | VND-INTERACTING 2 (VNI2)                                                              | TF (NAC type)                  | 108.59                                           | 107.89                                       | 109.62                                      |
| AT4G24060 | pda00786                            | DOF4.6                                                                                | TF (Dof type)                  | 107.98                                           | 113.85                                       | 120.99                                      |
| AT2G30590 | pda09817                            | WRKY21                                                                                | TF (WRKY type)                 | 107.96                                           | 103.95                                       | 101.85                                      |
| AT1G19940 | pda04559                            | GLYCOSYL HYDROLASE 9B5                                                                | CAZyme (GH9)                   | 107.70                                           | 113.76                                       | 97.21                                       |
| AT3G60140 | pda01565                            | DARK INDUCIBLE 2 (DIN2)/BETA GLUCOSIDASE 30 (BGLU30)/SENESCENCE-RELATED GENE 2 (SRG2) | CAZyme (GH1)                   | 107.62                                           | 98.58                                        | 97.85                                       |
| AT3G16920 | pda03591                            | CHITINASE-LIKE PROTEIN 2 (CTL2)                                                       | CAZyme (GH19)                  | 109.97                                           |                                              |                                             |
| AT4G15550 | pda05237                            | INDOLE-3-ACETATE BETA-D-GLUCOSYLTRANSFERASE (IAGLU)                                   | CAZyme (GT1)                   | 109.68                                           |                                              |                                             |
| AT4G23490 | pda03723                            |                                                                                       | Unknown function (DUF604)      | 108.44                                           |                                              |                                             |
| AT5G66460 | pda09521                            | ENDO-BETA-MANNASE 7                                                                   | CAZyme (GH5)                   | 107.94                                           |                                              |                                             |
| AT4G18780 | pda08626                            | CELLULOSE SYNTHASE 8 (CESA8)/IRREGULAR XYLEM 1 (IRX1)/LEAF WILTING 2 (LEW2)           | CAZyme (GT2)                   | 107.83                                           |                                              |                                             |
| AT1G45130 | pda05881                            | BETA-GALACTOSIDASE 5 (BGAL5)                                                          | CAZyme (GH35)                  | 107.68                                           |                                              |                                             |
| AT1G32170 | pda05067                            | XYLOGLUCAN ENDOTRANSGLUCOSYLASE/HYDROLASE 30 (XTH30)                                  | CAZyme (GH16)                  | 107.15                                           |                                              |                                             |
| AT2G29730 | pda08391                            | UDP-GLUCOSYL TRANSFERASE 71D1                                                         | CAZyme (GT1)                   | 106.95                                           |                                              |                                             |
| AT1G12240 | pda11488                            | VACUOLAR INVERTASE 2 (VI2)/FRUCTOSIDASE 4 (FRUCT4)                                    | CAZyme (GH32)                  | 106.90                                           |                                              |                                             |
| AT4G01070 | pda02106                            | UDP-GLUCOSE-DEPENDENT GLUCOSYLTRANSFERASE 72 B1                                       | CAZyme (GT1)                   | 106.38                                           |                                              |                                             |
| AT5G59590 | pda13180                            | UDP-GLUCOSYL TRANSFERASE 76E2                                                         | CAZyme (GT1)                   | 106.16                                           |                                              |                                             |
| AT1G67510 | pda11649                            |                                                                                       | LRR kinase                     | 105.82                                           |                                              |                                             |
| AT1G66140 | pda01764                            | ZINC FINGER PROTEIN 4 (ZFP4)                                                          | TF (C2H2 type)                 | 104.83                                           |                                              |                                             |
| AT2G34710 | pda08908                            | ATHB14/PHABULOSA (PHB)                                                                | TF (HD-ZIP type)               | 104.79                                           |                                              |                                             |
| AT1G26800 | pda01727                            |                                                                                       | RING-U-box protein             | 104.59                                           |                                              |                                             |
| AT4G39000 | pda10879                            | GLYCOSYL HYDROLASE 9B17                                                               | CAZyme (GH9)                   | 104.57                                           |                                              |                                             |
| AT2G46400 | pda07725                            | WRKY46                                                                                | TF (WRKY type)                 | 104.24                                           |                                              |                                             |
| AT1G72220 | pda03693                            |                                                                                       | RING-U-box protein             | 103.88                                           |                                              |                                             |
| AT1G32860 | pda09327                            |                                                                                       | CAZyme (GH17)                  | 103.46                                           |                                              |                                             |
| AT1G62990 | pda11355                            | KNOTTED-LIKE HOMEBOX OF ARABIDOPSIS THALIANA 7 (KNA17)/IRREGULAR XYLEM 11 (IRX11)     | TF (Homeobox type)             | 103.23                                           |                                              |                                             |
| AT1G23870 | pda06559                            | TREHALOSE-6-PHOSPHATASE SYNTHASE S9 (TPS9)                                            | CAZyme (GT20)                  | 103.00                                           |                                              |                                             |
| AT5G09460 | pda09252                            | SAC51 LIKE 1 (SACL1)                                                                  | TF (bHLH type)                 | 102.69                                           |                                              |                                             |
| AT5G17420 | pda09751                            | CELLULOSE SYNTHASE 7 (CESA7)/IRREGULAR XYLEM 3 (IRX3)/MUR10                           | CAZyme (GT2)                   | 102.64                                           |                                              |                                             |
| AT5G49260 | pda09629                            | BETA-XYLOSIDASE 1 (BXL1)                                                              | CAZyme (GH3)                   | 102.52                                           |                                              |                                             |
| AT1G22370 | pda00728                            | UDP-GLUCOSYL TRANSFERASE 85A5                                                         | CAZyme (GT1)                   | 102.24                                           |                                              |                                             |
| AT4G28530 | pda12409                            | ANAC074                                                                               | TF (NAC type)                  | 102.03                                           |                                              |                                             |
| AT1G19300 | pda06025                            | GALACTURONOSYLTRANSFERASE-LIKE 1 (GTL1)/GAOLAOZHUANGREN 1 (GLZ1)/PARVUS               | CAZyme (GT8)                   | 101.89                                           |                                              |                                             |
| AT5G61600 | pda05682                            | ERF104                                                                                | TF (ERF/AP2 type)              | 101.84                                           |                                              |                                             |
| AT4G08160 | pda10378                            |                                                                                       | CAZyme (GH10)                  | 101.65                                           |                                              |                                             |
| AT4G36540 | pda00396                            | BR ENHANCED EXPRESSION 2 (BEE2)                                                       | TF (bHLH type)                 | 101.57                                           |                                              |                                             |
| AT3G52840 | pda01770                            | BETA-GALACTOSIDASE 2 (BGAL2)                                                          | CAZyme (GH35)                  | 101.56                                           |                                              |                                             |
| AT5G56870 | pda07078                            | BETA-GALACTOSIDASE 4 (BGAL4)                                                          | CAZyme (GH35)                  | 101.33                                           |                                              |                                             |
| AT1G28470 | pda11199                            | SECONDARY WALL-ASSOCIATED NAC DOMAIN PROTEIN 3 (SND3)                                 | TF (NAC type)                  | 101.12                                           |                                              |                                             |
| AT5G49690 | pda10179                            |                                                                                       | CAZyme (GT1)                   | 101.07                                           |                                              |                                             |
| AT3G03690 | pda01556                            | UNFERTILIZED EMBRYO SAC 7 (UNE7)                                                      | CAZyme (GT14)                  | 100.72                                           |                                              |                                             |
| AT2G44480 | pda10838                            | BETA GLUCOSIDASE 17 (BGLU17)                                                          | CAZyme (GH1)                   | 100.69                                           |                                              |                                             |
| AT4G33330 | pda11621                            | GLUCURONIC ACID SUBSTITUTION OF XYLAN 2 (GXU2)                                        | CAZyme (GT8)                   | 100.64                                           |                                              |                                             |
| AT5G49450 | pda10097                            | BASIC LEUCINE-ZIPPER 1 (BZIP1)                                                        | TF (bZIP type)                 | 99.95                                            |                                              |                                             |
| AT2G47180 | pda04796                            | GALACTINOL SYNTHASE 1 (GOL1)                                                          | CAZyme (GT8)                   | 99.88                                            |                                              |                                             |
| AT1G43640 | pda06010                            | TUBBY LIKE PROTEIN 5 (TLP5)                                                           | TF (TLP type)                  | 99.77                                            |                                              |                                             |
| AT5G20250 | pda08032                            | DARK INDUCIBLE 10 (DIN10)/RAFFINOSE SYNTHASE 6 (RS6)                                  | CAZyme (GH36)                  | 99.68                                            |                                              |                                             |
| AT5G16600 | pda08058                            | MYB43                                                                                 | TF (MYB type)                  | 99.20                                            |                                              |                                             |
| AT3G13750 | pda06012                            | BETA-GALACTOSIDASE 1 (BGAL1)                                                          | CAZyme (GH35)                  | 98.95                                            |                                              |                                             |
| AT2G06850 | pda02220                            | XYLOGLUCAN ENDOTRANSGLUCOSYLASE/HYDROLASE 4 (XTH4)                                    | CAZyme (GH16)                  | 98.89                                            |                                              |                                             |
| AT4G02010 | pda09420                            |                                                                                       | Protein kinase                 | 98.87                                            |                                              |                                             |
| AT5G08370 | pda08229                            | ALPHA-GALACTOSIDASE 2 (AGAL2)                                                         | CAZyme (GH27)                  | 98.80                                            |                                              |                                             |
| AT4G32880 | pda08603                            | ATHB8                                                                                 | TF (HD-ZIP type)               | 98.70                                            |                                              |                                             |
| AT1G30080 | pda01029                            |                                                                                       | CAZyme (GH17)                  | 98.55                                            |                                              |                                             |
| AT3G10740 | pda05444                            | ALPHA-L-ARABINOFURANOSIDASE 1                                                         | CAZyme (GH51)                  | 98.42                                            |                                              |                                             |
| AT5G08750 | pda11021                            | SHOOT APICAL MERISTEM ARREST 2 (SHA2)                                                 | RING-FYVE/PHD protein          | 97.83                                            |                                              |                                             |
| AT5G64570 | pda08048                            | BETA-D-XYLOSIDASE 4 (XYL4)                                                            | CAZyme (GH3)                   | 97.80                                            |                                              |                                             |
| AT3G04670 | pda05451                            | WRKY39                                                                                | TF (WRKY type)                 | 97.57                                            |                                              |                                             |
| AT5G15470 | pda11680                            | GALACTURONOSYLTRANSFERASE 14 (GAUT14)                                                 | CAZyme (GT8)                   | 97.21                                            |                                              |                                             |
| AT5G39610 | pda04657                            | ANAC092                                                                               | TF (NAC type)                  | 97.18                                            |                                              |                                             |
| AT2G29740 | pda12967                            | UDP-GLUCOSYL TRANSFERASE 71C2                                                         | CAZyme (GT1)                   | 97.13                                            |                                              |                                             |
| AT3G23060 | pda09137                            | ARABIDOPSIS THALIANA BMI1C (AtBMI1C)                                                  | RING-U-box protein             | 97.12                                            |                                              |                                             |
| AT5G25190 | pda01468                            | ETHYLENE AND SALT INDUCIBLE 3 (ESI3)                                                  | TF (ERF/AP2 type)              | 97.09                                            |                                              |                                             |
| AT5G66320 | pda09868                            | GATA5                                                                                 | TF (GATA type)                 | 97.08                                            |                                              |                                             |
| AT1G52150 | pda06113                            | ATHB15/CORONA (CNA)/INCURVAIA 4 (ICU4)                                                | TF (HD-ZIP type)               | 96.89                                            |                                              |                                             |
| AT5G05410 | pda03329                            | DEHYDRATION-RESPONSIVE ELEMENT BINDING PROTEIN 2A (DREB2A)                            | TF (ERF/AP2 type)              | 96.70                                            |                                              |                                             |
| AT5G64340 | pda04943                            | SUPPRESSOR OF ACAULIS 51 (SACS1)                                                      | TF (bHLH type)                 | 96.63                                            |                                              |                                             |
| AT5G67230 | pda06500                            | IRREGULAR XYLEM 14-LIKE (IRX14-L)                                                     | CAZyme (GT43)                  | 96.26                                            |                                              |                                             |
| AT5G24010 | pda07724                            |                                                                                       | Protein kinase                 | 95.78                                            |                                              |                                             |
| AT2G31070 | pda02921                            | TCP DOMAIN PROTEIN 10 (TCP10)                                                         | TF (TCP type)                  | 95.63                                            |                                              |                                             |
| AT1G61810 | pda08218                            | BETA-GLUCOSIDASE 45 (BGLU45)                                                          | CAZyme (GH1)                   | 95.28                                            |                                              |                                             |
| AT1G78060 | pda06112                            |                                                                                       | CAZyme (GH3)                   | 93.99                                            |                                              |                                             |
| AT1G77450 | pda12014                            | ANAC032                                                                               | TF (NAC type)                  | 93.90                                            |                                              |                                             |
| AT3G26744 | pda08970                            | INDUCER OF CBP EXPRESSION 1 (ICE1)/SCREAM (SCRM)                                      | TF (bHLH type)                 | 92.39                                            |                                              |                                             |
| AT4G25000 | pda06256                            | ALPHA-AMYLASE-LIKE/AMY1                                                               | CAZyme (GH13)                  | 91.62                                            |                                              |                                             |
| AT5G15050 | pda06054                            | GLCA TRANSFERASE 14B (GLCAT14B)                                                       | CAZyme (GT14)                  | 91.56                                            |                                              |                                             |
| AT1G34190 | pda09853                            | REGULATORS OF AOX1A 2 (RAO2)                                                          | TF (NAC type)                  | 90.17                                            |                                              |                                             |
| AT4G33440 | pda12581                            |                                                                                       | CAZyme (GH28)                  | 89.81                                            |                                              |                                             |
| AT1G35460 | pda02680                            | ATCF1 ASSOCIATED PROTEIN 2 (CFAP2)/FLOWERING BHLH 1 (FBH1)                            | TF (bHLH type)                 | 89.54                                            |                                              |                                             |
| AT1G68810 | pda06930                            | ABNORMAL SHOOT 5 (ABS5)/TMO5-LIKE1 (TSL1)                                             | TF (bHLH type)                 | 83.52                                            |                                              |                                             |
| AT3G04420 | pda06907                            | ANAC048                                                                               | TF (NAC type)                  | 81.23                                            |                                              |                                             |
| AT3G02310 | pda12886                            | AGAMOUS-LIKE 4 (AGL4)/SEPALATA 2 (SEP2)                                               | TF (MADS-box type)             | 76.44                                            |                                              |                                             |

<sup>a</sup>Arabidopsis full-length cDNA clones developed by RIKEN Genomic Sciences Center were used to generate overexpressors.

<sup>b</sup>TF, transcription factor; CAZyme, carbohydrate active enzyme; GH, glycoside hydrolase; GT, glycosyltransferase.

<sup>c</sup>Three independent lines of overexpressors and control plants were subjected to enzymatic saccharification analysis, and the average yields of 3 lines were compared between overexpressors and control plants. Ratio of sugar yields of overexpressors to those of control plants were shown. Bold, statistically-significant different from the control (Student's t-test, p<0.05). Pink and blue shading indicate overexpression lines showing a statistically significant increase and decrease in glucose yields, respectively.

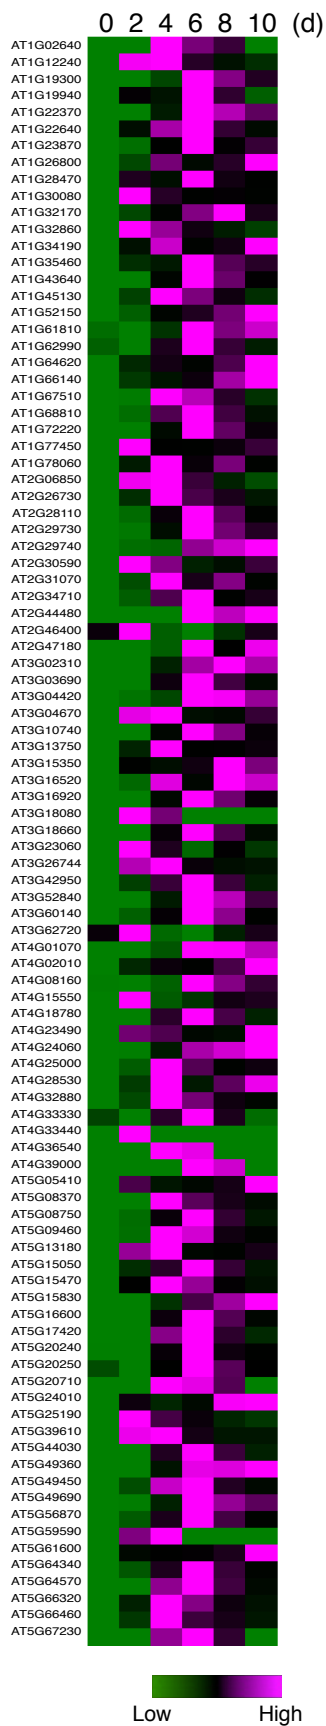

Figure S1. Expression patterns of the 96 selected genes during xylem vessel cell differentiation. The microarray data (the Arabidopsis full-genome GeneChip array ATH1, Affymetrix) for the 96 genes were extracted from the transcriptome data for the in vitro xylem vessel cell inducible system from Arabidopsis suspension cells (Kubo et al. 2005). The expression level of each gene was normalized within the time course (0, 2, 4, 6, 8, and 10 days after the induction of cell differentiation) data independently, and the data are displayed as heat maps. Note that all genes selected here were upregulated after the induction of xylem vessel cell differentiation. For details about the transcriptome data, please refer to Kubo et al. (2005).

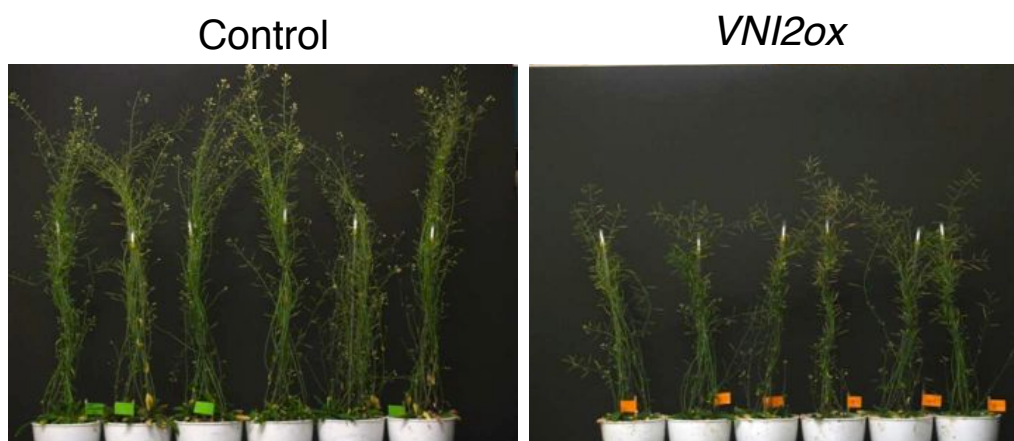

Figure S2. Effects of *VNI2* overexpression on plant growth. Forty-day-old plants of the control line (left) and the *VNI2* overexpressor (*VNI2ox*; right) are shown. The plant height of *VNI2ox* is clearly lower than that of the control lines, indicating that the overexpression of *VNI2* affects plant growth.

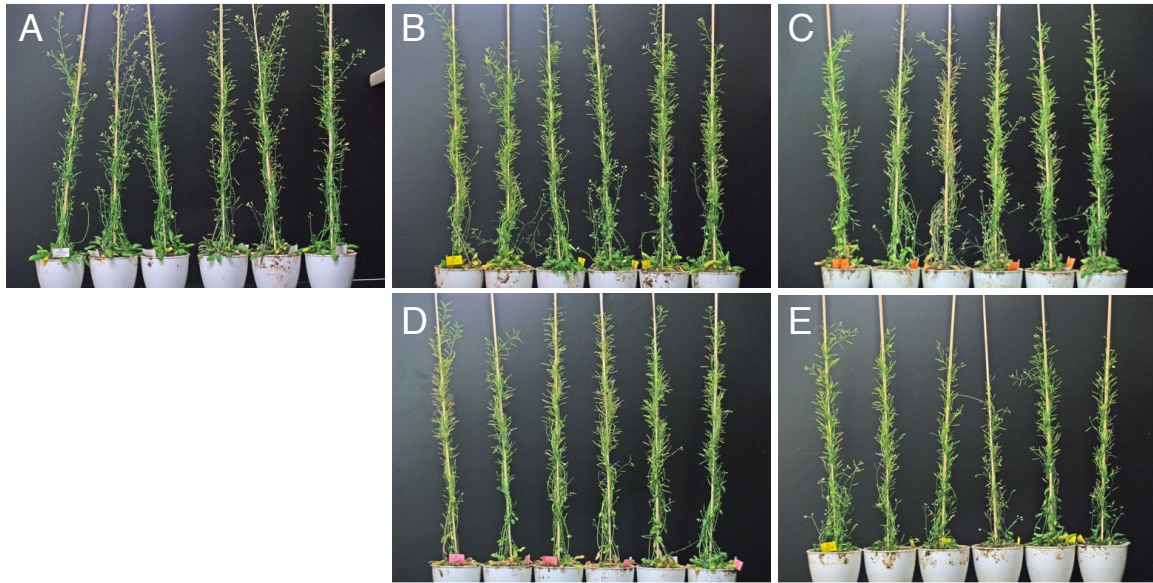

Figure S3. Images of 40-day-old plants of the control lines (A) and transgenic plants overexpressing *BXL2* (*BXL2ox*; B), *UGT88A1* (*UGT88A1ox*; C), *AT3G15350* (putatively encoding a class GT14 glycosyltransferase; *GT14ox*; D), and *Dof4.6* (*Dof4.6ox*; E). The plant sizes of the control and overexpressor lines were similar.
